# Supplementary material for: In vitro simultaneous mapping of the partial pressure of oxygen, pH and inorganic phosphate using electron paramagnetic resonance
Source: Royal Society of Chemistry journal article supplement (doi:10.1039/d0an00168f), 2020-01-01
Supplement: d0an00168f1.pdf [file d0an00168f1.pdf]

## Electronic Supplementary Information

### ***In vitro* simultaneous mapping of the partial pressure of oxygen, pH and inorganic phosphate using electron paramagnetic resonance**

Akihiro Taguchi,<sup>a</sup> Stephen DeVience,<sup>b,c</sup> Benoit Driesschaert,<sup>b,d</sup> Valery V. Khrantsov<sup>b,c</sup> and Hiroshi Hirata<sup>\*e</sup>

<sup>a</sup> Division of Bioengineering and Bioinformatics, Graduate School of Information Science and Technology, Hokkaido University, North 14, West 9, Kita-ku, Sapporo, 060-0814, Japan

<sup>b</sup> In Vivo Multifunctional Magnetic Resonance centre, West Virginia University, Robert C. Byrd Health Sciences Centre, 1 Medical Centre Drive, Morgantown, West Virginia 26506, USA

<sup>c</sup> Department of Biochemistry, School of Medicine, West Virginia University, Morgantown, WV, 26506, USA

<sup>d</sup> Department of Pharmaceutical Sciences, School of Pharmacy, West Virginia University, Morgantown, WV, 26506, USA

<sup>e</sup> Division of Bioengineering and Bioinformatics, Faculty of Information Science and Technology, Hokkaido University, North 14, West 9, Kita-ku, Sapporo, 060-0814, Japan

\* E-mail: [hhirata@ist.hokudai.ac.jp](mailto:hhirata@ist.hokudai.ac.jp)

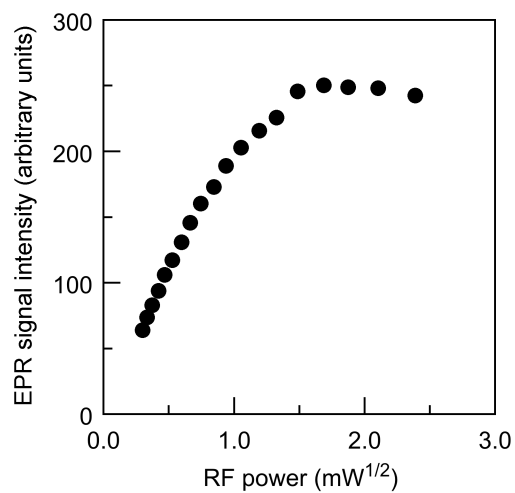

**Fig. S1** RF power saturation characteristics of the signal intensity for p<sub>1</sub>TAM-D. The measurement parameters of the spectrum were as follows: magnetic field scanning 0.8 mT, magnetic field modulation 8  $\mu$ T, scan duration 100 ms, the time constant of lock-in amplifier 30  $\mu$ s, the number of data points per scan 2048 and the number of averaging 300. The RF magnetic field generation coefficient of the RF resonator was 98  $\mu$ T/W<sup>1/2</sup>.

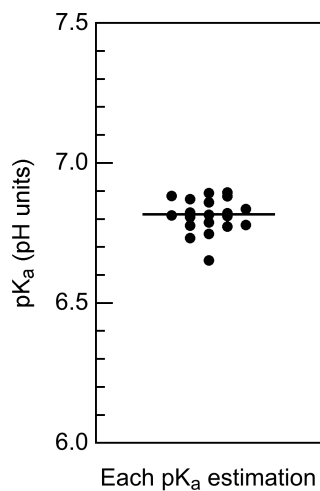

**Fig. S2** The scatter of acid dissociation constant  $pK_a$  estimation. The mean of estimated  $pK_a$  values was obtained from 20 EPR spectra with different sample pH values. The bar in the plot (6.81) shows the mean of the  $pK_a$  plots. The standard deviation was estimated to be 0.061 pH units, and the standard error of the mean was estimated to be 0.014 pH units (sample size  $n = 20$ ). Each plot ( $pK_a$ ) was obtained from the measured fraction  $P_a$  and the known-sample pH value. In this measurement, dissolved oxygen was purged by nitrogen gas bubbling, and the measurements were performed at room temperature (25°C).

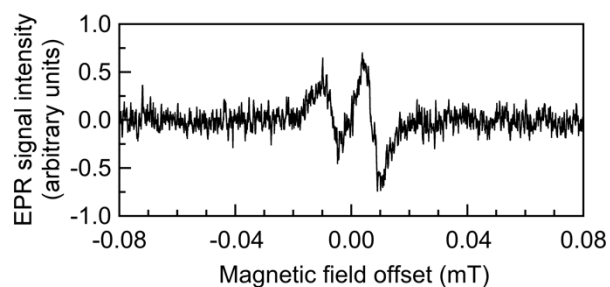

**Fig. S3** Representative zero-gradient EPR spectrum for the multiple conditioned p<sub>1</sub>TAM-D solutions. This spectrum was recorded from the samples shown in Fig. 3 with a single accumulation (scan duration of 0.1 s). The measurement parameters are given in Experimental section (EPR spectroscopy and imaging). The signal-to-noise ratio of this spectrum was estimated to be 7.5. The noise amplitude was given as the two-fold root-mean-square value of the baseline noise, which was obtained from the 200 data points at the left end of the spectrum.

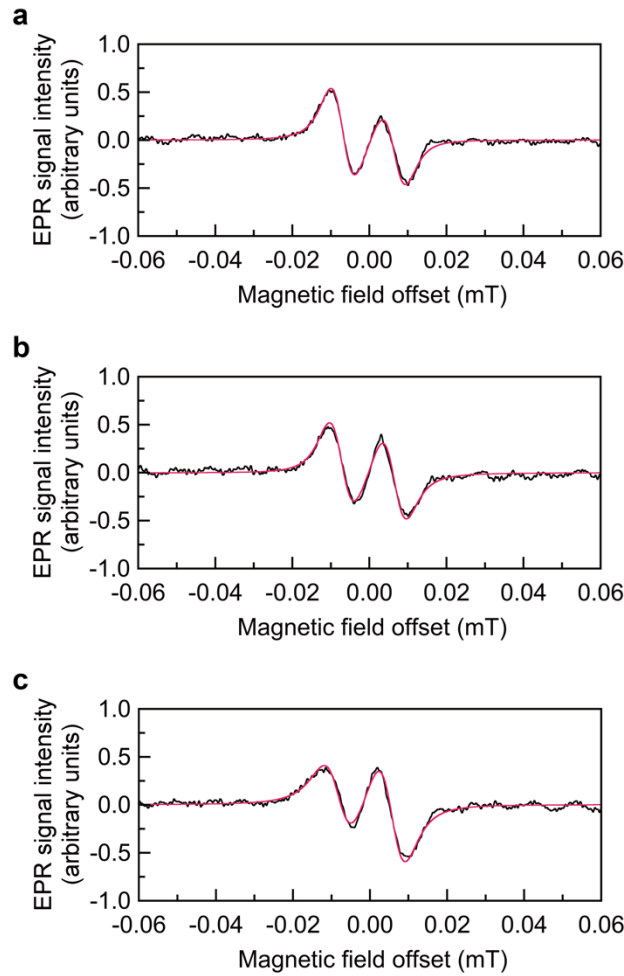

**Fig. S4** Representative EPR spectra for the multiple conditioned  $p_1$ TAM-D solutions. EPR spectra at the specified voxels (almost the centre of each tube) in the tube #4 (a), #5 (b) and #6 (c). Black and red lines represent reconstructed EPR spectra and corresponding fitted spectra, respectively. The prepared conditions were  $pO_2 = 0$  mmHg,  $pH=6.70$  and  $Pi=4.0$  mM in the tube #4;  $pO_2 = 19$  mmHg,  $pH = 6.78$  and  $Pi = 2.5$  mM in the tube #5;  $pO_2 = 38$  mmHg,  $pH = 6.90$  and  $Pi = 1.25$  mM in the tube #6. The concentration of NaCl was 38 mM for three samples. The spectral lineshape at each voxel derives the  $pO_2$ ,  $pH$  and  $Pi$  values with the predetermined calibration curves.

**Table S1** Comparison of imaging modalities for the partial pressure of oxygen, pH and inorganic phosphate in biomedical applications.

| Imaging modalities                     | pO <sub>2</sub>                                                                                                                                                                            |                                                                                                                                                                                                        | pH                                                                                                                                                                                                           |                                                                                                                                   | Pi                                                                                                                                                                        |                                                                                                                                                        |
|----------------------------------------|--------------------------------------------------------------------------------------------------------------------------------------------------------------------------------------------|--------------------------------------------------------------------------------------------------------------------------------------------------------------------------------------------------------|--------------------------------------------------------------------------------------------------------------------------------------------------------------------------------------------------------------|-----------------------------------------------------------------------------------------------------------------------------------|---------------------------------------------------------------------------------------------------------------------------------------------------------------------------|--------------------------------------------------------------------------------------------------------------------------------------------------------|
|                                        | Pros                                                                                                                                                                                       | Cons                                                                                                                                                                                                   | Pros                                                                                                                                                                                                         | Cons                                                                                                                              | Pros                                                                                                                                                                      | Cons                                                                                                                                                   |
| <sup>19</sup> F-MRI                    | <ul style="list-style-type: none"> <li>• Preclinical use</li> <li>• Clinical scanner available</li> </ul>                                                                                  | <ul style="list-style-type: none"> <li>• Low sensitivity</li> <li>• High concentration of the probe</li> </ul>                                                                                         |                                                                                                                                                                                                              |                                                                                                                                   |                                                                                                                                                                           |                                                                                                                                                        |
| BOLD MRI                               | <ul style="list-style-type: none"> <li>• Clinically applicable</li> <li>• Availability of <sup>1</sup>H MRI anatomical co-imaging</li> </ul>                                               | <ul style="list-style-type: none"> <li>• Indirect assessment of oxygen (blood flow/deoxyhemoglobin content)</li> </ul>                                                                                 |                                                                                                                                                                                                              |                                                                                                                                   |                                                                                                                                                                           |                                                                                                                                                        |
| MOBILE MRI                             | <ul style="list-style-type: none"> <li>• Clinically applicable</li> <li>• Availability of <sup>1</sup>H MRI anatomical co-imaging</li> </ul>                                               | <ul style="list-style-type: none"> <li>• Qualitative assessment of hypoxic areas</li> </ul>                                                                                                            |                                                                                                                                                                                                              |                                                                                                                                   |                                                                                                                                                                           |                                                                                                                                                        |
| <sup>18</sup> F-MISO PET               | <ul style="list-style-type: none"> <li>• High detection sensitivity</li> <li>• Clinically available</li> <li>• Hypoxic cell targeting</li> </ul>                                           | <ul style="list-style-type: none"> <li>• Radioactive tracer</li> <li>• Non-linear response to pO<sub>2</sub></li> </ul>                                                                                |                                                                                                                                                                                                              |                                                                                                                                   |                                                                                                                                                                           |                                                                                                                                                        |
| Fluorescent/phosphorescent imaging     | <ul style="list-style-type: none"> <li>• High spatial resolution</li> </ul>                                                                                                                | <ul style="list-style-type: none"> <li>• Limited penetration depth</li> </ul>                                                                                                                          | <ul style="list-style-type: none"> <li>• High spatial resolution</li> </ul>                                                                                                                                  | <ul style="list-style-type: none"> <li>• Limited penetration depth</li> </ul>                                                     |                                                                                                                                                                           |                                                                                                                                                        |
| Near-infrared spectroscopy and imaging | <ul style="list-style-type: none"> <li>• Clinically applicable</li> </ul>                                                                                                                  | <ul style="list-style-type: none"> <li>• Not detecting pO<sub>2</sub> (detecting oxygen saturation)</li> </ul>                                                                                         |                                                                                                                                                                                                              |                                                                                                                                   |                                                                                                                                                                           |                                                                                                                                                        |
| Photo-acoustic imaging                 | <ul style="list-style-type: none"> <li>• Larger imaging depth than Fluorescent imaging</li> </ul>                                                                                          | <ul style="list-style-type: none"> <li>• Difficult to quantify pO<sub>2</sub></li> </ul>                                                                                                               |                                                                                                                                                                                                              |                                                                                                                                   |                                                                                                                                                                           |                                                                                                                                                        |
| (acido) CEST-MRI                       |                                                                                                                                                                                            |                                                                                                                                                                                                        | <ul style="list-style-type: none"> <li>• Clinically available</li> <li>• CT agents (e.g., iopamidol) applicable to IV delivery</li> <li>• Availability of <sup>1</sup>H MRI anatomical co-imaging</li> </ul> | <ul style="list-style-type: none"> <li>• Low sensitivity</li> </ul>                                                               |                                                                                                                                                                           |                                                                                                                                                        |
| <sup>31</sup> P-NMR/MRI                |                                                                                                                                                                                            |                                                                                                                                                                                                        | <ul style="list-style-type: none"> <li>• Specific detection of extracellular pH using exogenous <sup>31</sup>P probes</li> </ul>                                                                             | <ul style="list-style-type: none"> <li>• Low sensitivity</li> </ul>                                                               | <ul style="list-style-type: none"> <li>• No imaging agent required</li> </ul>                                                                                             | <ul style="list-style-type: none"> <li>• Low detection sensitivity</li> <li>• Difficulties to discriminate intra and extracellular Pi</li> </ul>       |
| Hyperpolarized <sup>13</sup> C-MRI     |                                                                                                                                                                                            |                                                                                                                                                                                                        | <ul style="list-style-type: none"> <li>• Clinical scanner available</li> </ul>                                                                                                                               | <ul style="list-style-type: none"> <li>• Limited acquisition time/measurement time</li> <li>• Hyper-polarizer required</li> </ul> |                                                                                                                                                                           |                                                                                                                                                        |
| OMRI (PEDRI)                           | <ul style="list-style-type: none"> <li>• Good spatial resolution</li> <li>• Concurrency using multiple scans</li> <li>• Availability of <sup>1</sup>H MRI anatomical co-imaging</li> </ul> | <ul style="list-style-type: none"> <li>• High RF power absorption</li> </ul>                                                                                                                           | <ul style="list-style-type: none"> <li>• Good spatial resolution</li> <li>• Concurrency using multiple scans</li> <li>• Specific detection of extracellular pH</li> </ul>                                    | <ul style="list-style-type: none"> <li>• High RF power absorption</li> </ul>                                                      | <ul style="list-style-type: none"> <li>• Good spatial resolution</li> <li>• Concurrency using multiple scans</li> <li>• Specific detection of extracellular Pi</li> </ul> | <ul style="list-style-type: none"> <li>• High RF power absorption</li> </ul>                                                                           |
| EPR*                                   | <ul style="list-style-type: none"> <li>• High accuracy and sensitivity to absolute values of oxygen concentration</li> <li>• Concurrency using multi-functional pTAM probe</li> </ul>      | <ul style="list-style-type: none"> <li>• Concentration-induced line broadening</li> <li>• Moderate resolution <i>in vitro</i></li> <li>• Intra-tissue delivery of pTAM probe <i>in vivo</i></li> </ul> | <ul style="list-style-type: none"> <li>• Specific detection of extracellular pH</li> <li>• Good accuracy</li> <li>• Concurrency using pTAM probe</li> </ul>                                                  | <ul style="list-style-type: none"> <li>• Intra-tissue delivery of pTAM probe, <i>in vivo</i></li> </ul>                           | <ul style="list-style-type: none"> <li>• Specific detection of extracellular Pi</li> <li>• Concurrency using pTAM probe</li> </ul>                                        | <ul style="list-style-type: none"> <li>• Moderate resolution <i>in vitro</i></li> <li>• Intra-tissue delivery of pTAM probe, <i>in vivo</i></li> </ul> |

Note: IV stands for 'intravenous' route. \* Faster acquisition required for 3D mapping (CW-EPR).

**Table S2** The measured values of the partial pressure of oxygen, pH and inorganic phosphate for sample No. 4 (Fig. 5) with different threshold levels (mean  $\pm$  SD).

| Threshold level (%) | Number of voxels | pO <sub>2</sub> (mmHg) | pH              | Pi (mM)       |
|---------------------|------------------|------------------------|-----------------|---------------|
| 90                  | 73               | 4 $\pm$ 5              | 6.70 $\pm$ 0.01 | 4.2 $\pm$ 0.2 |
| 80                  | 174              | 4 $\pm$ 5              | 6.70 $\pm$ 0.01 | 4.2 $\pm$ 0.3 |
| 70                  | 285              | 5 $\pm$ 5              | 6.70 $\pm$ 0.01 | 4.1 $\pm$ 0.3 |
| 60                  | 427              | 5 $\pm$ 5              | 6.70 $\pm$ 0.01 | 4.1 $\pm$ 0.3 |
| 50                  | 608              | 5 $\pm$ 5              | 6.70 $\pm$ 0.01 | 4.1 $\pm$ 0.4 |
| 40                  | 834              | 5 $\pm$ 5              | 6.70 $\pm$ 0.01 | 4.1 $\pm$ 0.4 |
| 30                  | 1244             | 5 $\pm$ 5              | 6.70 $\pm$ 0.01 | 4.0 $\pm$ 0.4 |
| 20                  | 1749             | 5 $\pm$ 5              | 6.70 $\pm$ 0.01 | 4.0 $\pm$ 0.4 |

**Table S3** The measured values of the partial pressure of oxygen, pH and inorganic phosphate for sample No. 5 (Fig. 5) with different threshold levels (mean  $\pm$  SD).

| Threshold level (%) | Number of voxels | pO <sub>2</sub> (mmHg) | pH              | Pi (mM)       |
|---------------------|------------------|------------------------|-----------------|---------------|
| 90                  | ---              | ---                    | ---             | ---           |
| 80                  | ---              | ---                    | ---             | ---           |
| 70                  | 31               | 23 $\pm$ 3             | 6.75 $\pm$ 0.01 | 2.4 $\pm$ 0.4 |
| 60                  | 142              | 22 $\pm$ 4             | 6.75 $\pm$ 0.01 | 2.3 $\pm$ 0.4 |
| 50                  | 304              | 22 $\pm$ 5             | 6.75 $\pm$ 0.01 | 2.3 $\pm$ 0.4 |
| 40                  | 520              | 21 $\pm$ 5             | 6.76 $\pm$ 0.01 | 2.3 $\pm$ 0.5 |
| 30                  | 850              | 21 $\pm$ 5             | 6.76 $\pm$ 0.01 | 2.3 $\pm$ 0.5 |
| 20                  | 1433             | 21 $\pm$ 6             | 6.76 $\pm$ 0.01 | 2.3 $\pm$ 0.6 |

**Table S4** The measured values of the partial pressure of oxygen, pH and inorganic phosphate in sample No. 6 (Fig. 5) with different threshold levels (mean  $\pm$  SD).

| Threshold level (%) | Number of voxels | pO <sub>2</sub> (mmHg) | pH              | Pi (mM)       |
|---------------------|------------------|------------------------|-----------------|---------------|
| 90                  | ---              | ---                    | ---             | ---           |
| 80                  | 29               | 56 $\pm$ 5             | 6.87 $\pm$ 0.01 | 1.3 $\pm$ 0.2 |
| 70                  | 161              | 49 $\pm$ 9             | 6.88 $\pm$ 0.01 | 1.6 $\pm$ 0.4 |
| 60                  | 346              | 47 $\pm$ 9             | 6.88 $\pm$ 0.01 | 1.5 $\pm$ 0.4 |
| 50                  | 558              | 45 $\pm$ 10            | 6.88 $\pm$ 0.02 | 1.5 $\pm$ 0.5 |
| 40                  | 830              | 43 $\pm$ 10            | 6.88 $\pm$ 0.02 | 1.5 $\pm$ 0.5 |
| 30                  | 1170             | 42 $\pm$ 10            | 6.88 $\pm$ 0.02 | 1.5 $\pm$ 0.6 |
| 20                  | 1616             | 41 $\pm$ 10            | 6.88 $\pm$ 0.02 | 1.5 $\pm$ 0.6 |

Note: These values in Tables S2 to S4 were obtained from the middle half of the reconstructed data (36 out of 72 slice images).
